# Supplementary material
Source: Springer Nature journal article supplement (https://www.springermedizin.de/resource/supplementary/12885_2008_1436_MOESM2_ESM.pdf/9472000)

The Percentage of BST2 mRNA expression (%)

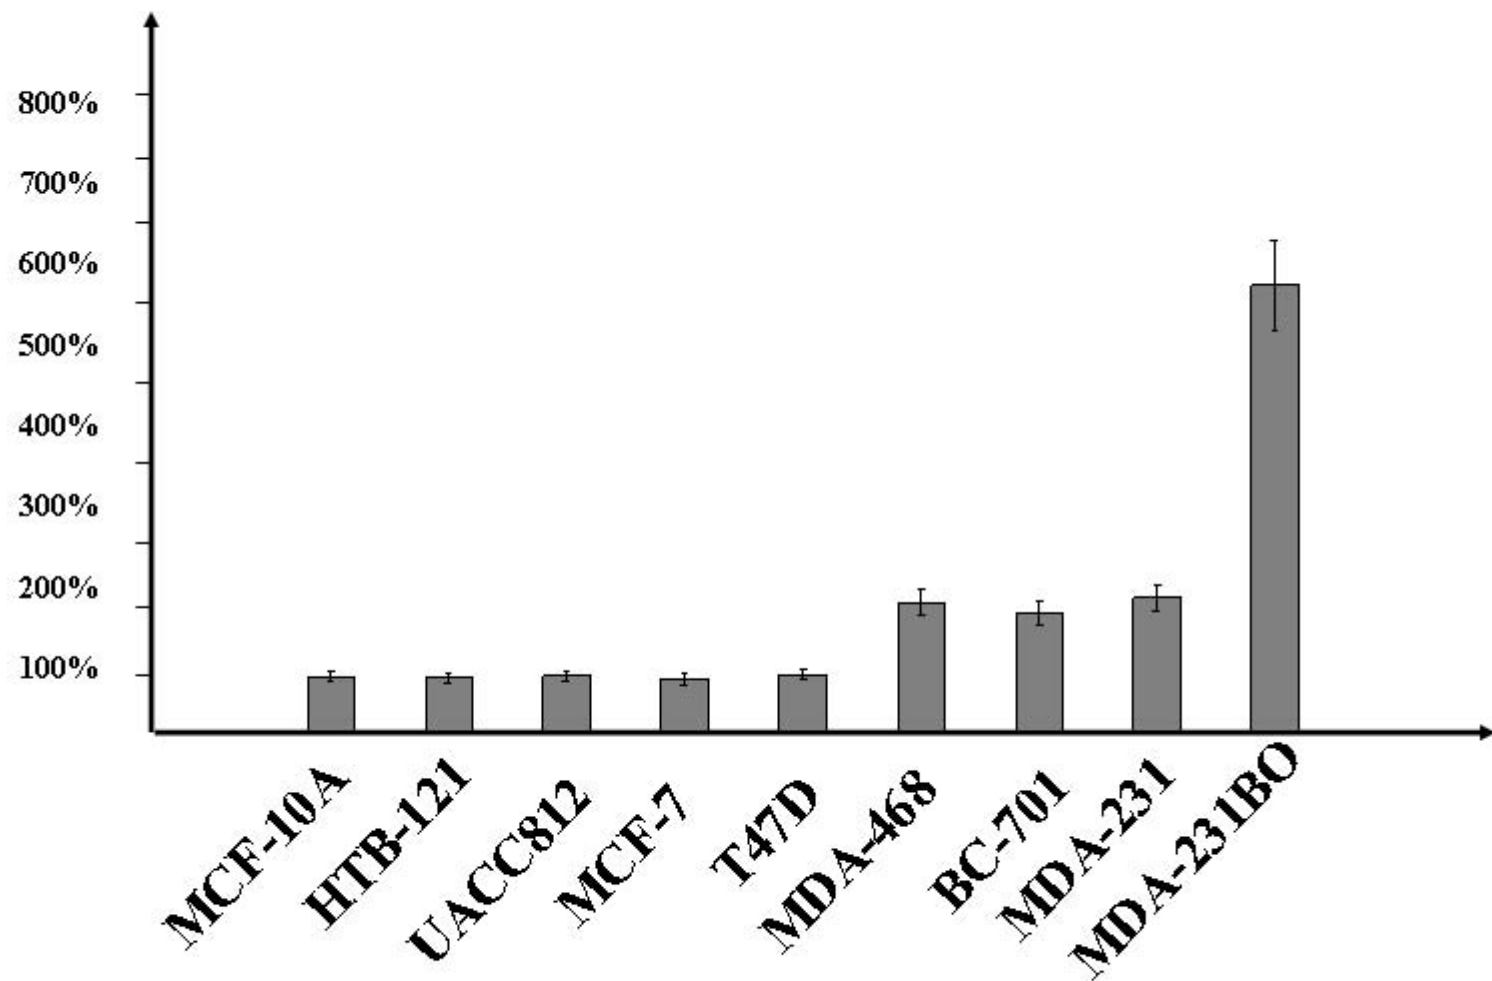

Supplement: MOESM2 [file 9472000]
